# Supplementary material
Source: PubMed Central journal article supplement (PMC4878149)
Supplement: NIHMS785811-supplement-supplement_1.pdf [file NIHMS785811-supplement-supplement_1.pdf]

## Statistics

Unless otherwise indicated data are presented as mean  $\pm$  standard error of mean (s.e.m.). For statistical analysis, two-tailed, unpaired Student's t-test and ANOVA for multiple comparisons were employed. Post-hoc comparisons were performed with the Tukey test.  $p < 0.05$  was considered statistically significant. All significant p-values are included in Table S4. Basic analyses were performed with Excel (Microsoft) and Prism (GraphPad Software, Inc.). Furthermore, Volocity Quantitation (PerkinElmer) was used for image analysis and gene expression data was analyzed with Partek Genomics Suite (Partek) using ANOVA models and GSEA results were plotted using Sigmaplot 12.2.

## Supplementary Materials:

Fig. S1. CD treatment does not influence general cardiovascular parameters.

Fig. S2. CD does not alter plasma cholesterol metabolite and phytosterol concentrations in atherosclerosis regression and treatment trials.

Fig. S3. 10 mM CD does not affect viability of murine macrophages.

Fig. S4. CD mediates intracellular CC dissolution.

Fig. S5. CC loading of macrophages induces lipid droplet accumulation.

Fig. S6. CD treatment induces the expression of cholesterol efflux transporters in the aortic arch of atherosclerotic mice.

Fig. S7. CD treatment does not alter murine lipoprotein profiles.

Table S1. LXR target gene list for GSEA analysis of BMDMs from WT and LXR $\alpha^{-/-}$  $\beta^{-/-}$  mice.

Table S2. List of additional metabolic and regulatory genes (nCounter Panel Plus).

Table S3. LXR target gene list for GSEA analysis of human atherosclerotic plaques.

Table S4. Original data of all figures.

## References:

1. J. G. Robinson, M. Farnier, M. Krempf, J. Bergeron, G. Luc, M. Averna, E. S. Stroes, G. Langslet, F. J. Raal, M. E. Shahawy, M. J. Koren, N. E. Lepor, C. Lorenzato, R. Pordy, U. Chaudhari, J. J. P. Kastelein, ODYSSEY LONG TERM Investigators, Efficacy and Safety of Alirocumab in Reducing Lipids and Cardiovascular Events, *N Engl J Med* (2015), doi:10.1056/NEJMoa1501031.
2. M. S. Sabatine, R. P. Giugliano, S. D. Wiviott, F. J. Raal, D. J. Blom, J. Robinson, C. M. Ballantyne, R. Somaratne, J. Legg, S. M. Wasserman, R. Scott, M. J. Koren, E. A. Stein, Open-Label Study of Long-Term Evaluation against LDL Cholesterol (OSLER) Investigators, Efficacy and Safety of Evolocumab in Reducing Lipids and Cardiovascular Events, *N Engl J Med*, 150315080057008 (2015).

**Supplementary Materials:**

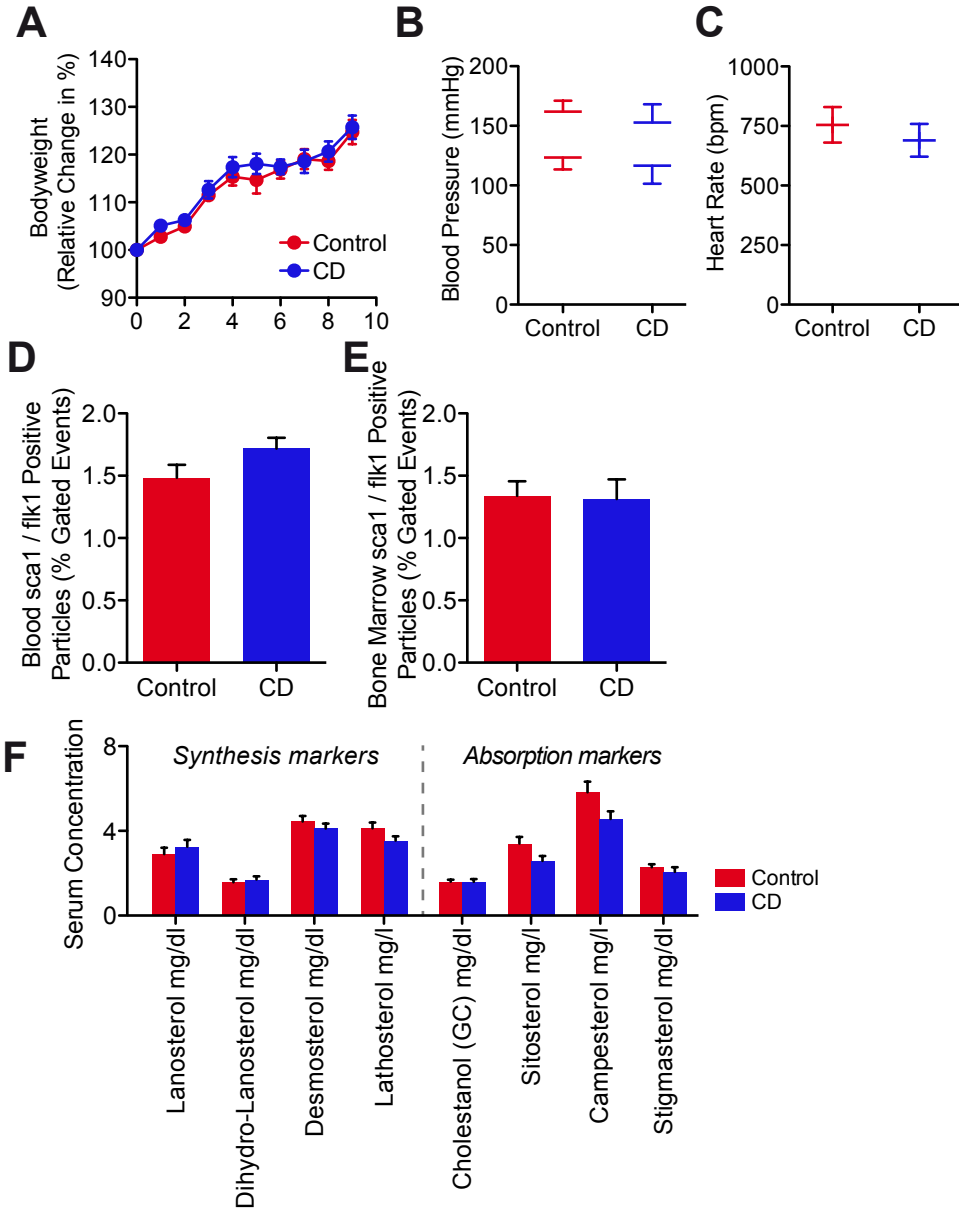

Fig. S1

**Fig. S1. CD treatment does not influence general cardiovascular parameters.** ApoE<sup>-/-</sup> mice were fed a cholesterol-rich diet for eight weeks and concomitantly treated with 2 g CD/ kg body weight or vehicle control twice a week (n=7-8 per group). **(A)** Weekly change in bodyweight relative to starting weight. **(B)** Blood pressure and **(C)** heart rate in the final week of CD or control treatment. Percent of **(D)** circulating and **(E)** bone marrow sca1/flk1 positive cells relative to the number of gated events. **(F)** Plasma concentration of cholesterol precursors as “synthesis markers”, the metabolite cholestanol and selected phytosterols as “absorption markers”. Data are shown as mean + s.e.m. or mean +/- s.e.m.

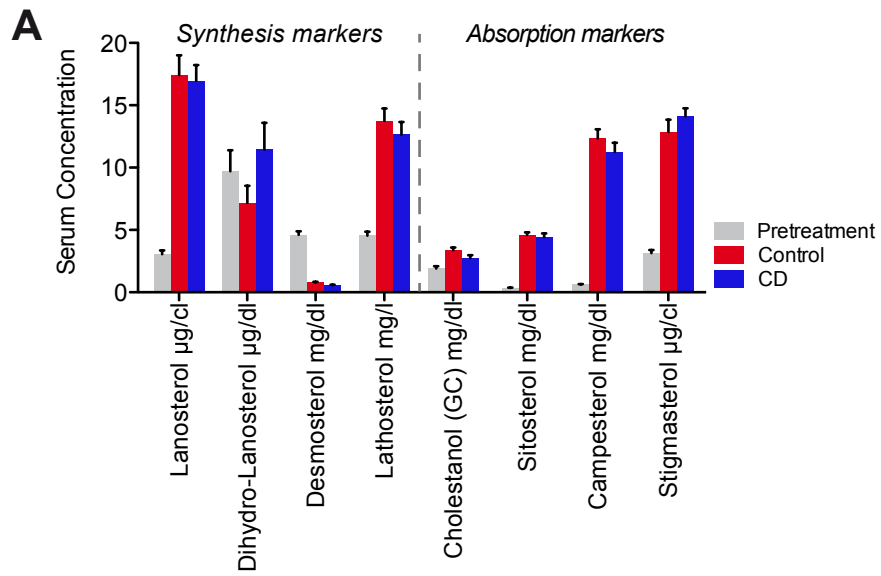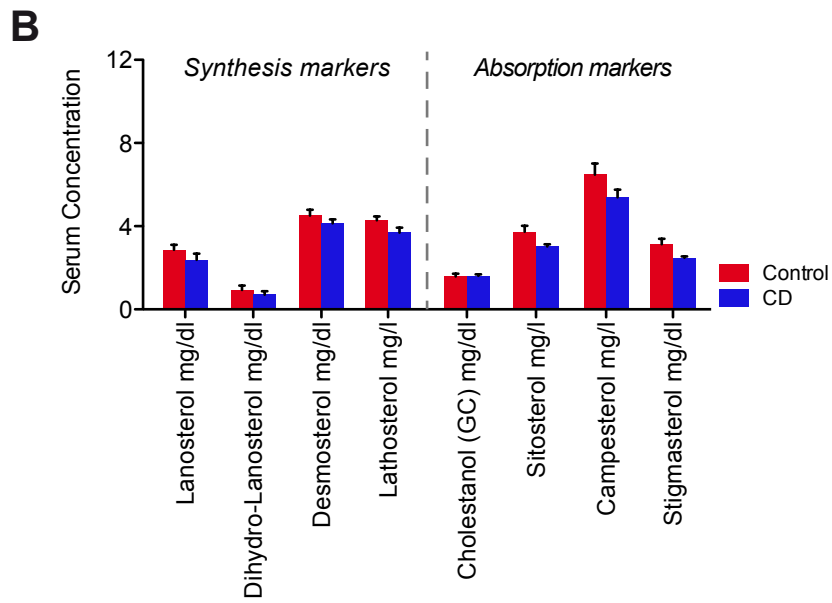

Fig. S2

**Fig. S2. CD treatment does not alter plasma sterol concentrations in atherosclerosis regression trials.** Plasma concentration of cholesterol precursors as “synthesis markers”, the metabolite cholestanol and selected phytosterols as “absorption markers” in **(A)** regression and **(B)** treatment trials (n=6-8 per group). Data are shown as mean + s.e.m.

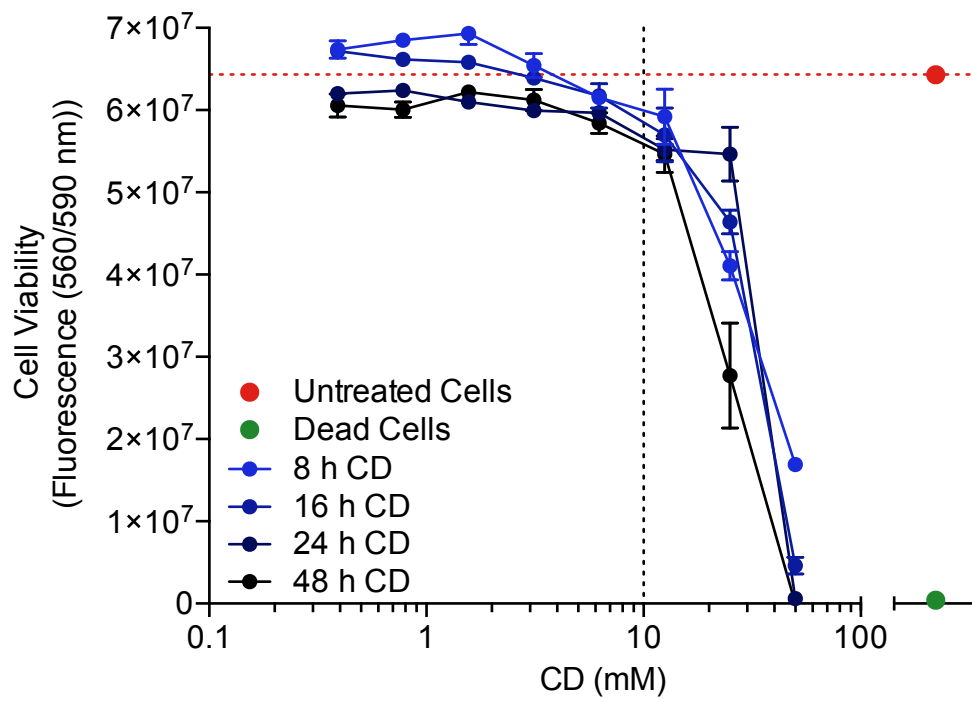

Fig. S3

**Fig. S3. 10 mM CD does not affect the viability of murine macrophages.** Cell viability of iMacs incubated for indicated times with increasing concentrations of CD ranging from 0.391 mM to 50 mM. Dashed line indicates commonly used CD concentration (10 mM). Data are shown as mean  $\pm$  s.e.m.



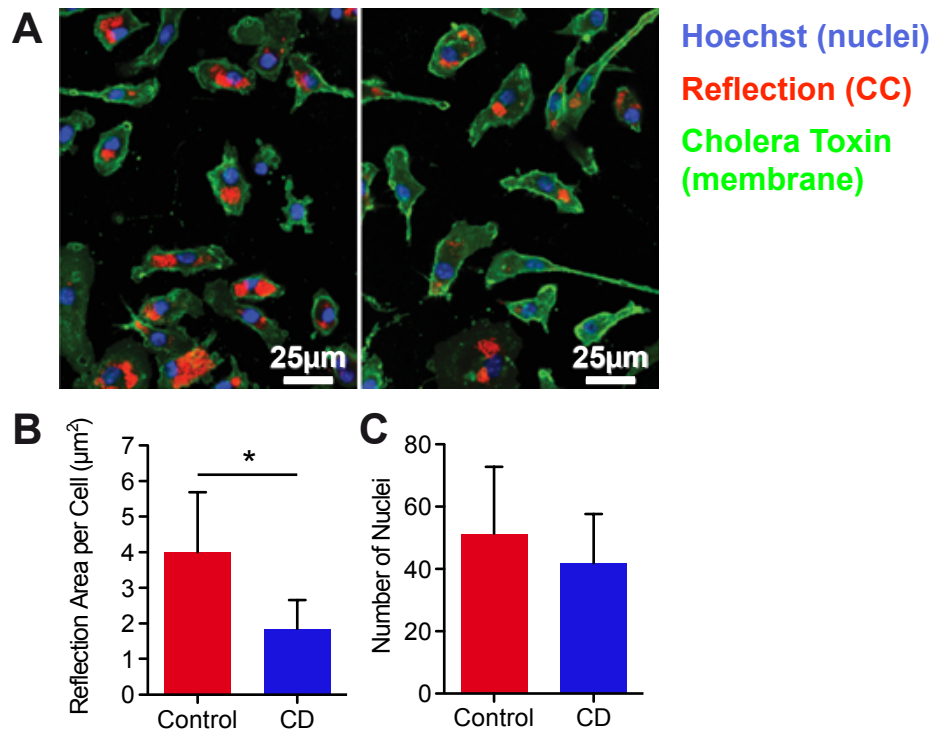

Fig. S4

**Fig. S4. CD mediates intracellular CC dissolution.** BMDMs were loaded with 100  $\mu\text{g}$  CC per  $1 \times 10^6$  cells for 3 h and incubated with control or CD for 24 h. Nuclei were stained with Hoechst (blue) and the plasma membrane was visualized using Alexa Fluor 647–coupled cholera toxin subunit B (green). The cells were imaged using confocal laser reflection microscopy. Intracellular CC reflection signal (red) was determined by automated image quantification based on cell mask. Data are shown as mean + s.e.m, Control vs. CD, unpaired one-tailed Student's t test; \* $p < 0.05$ .

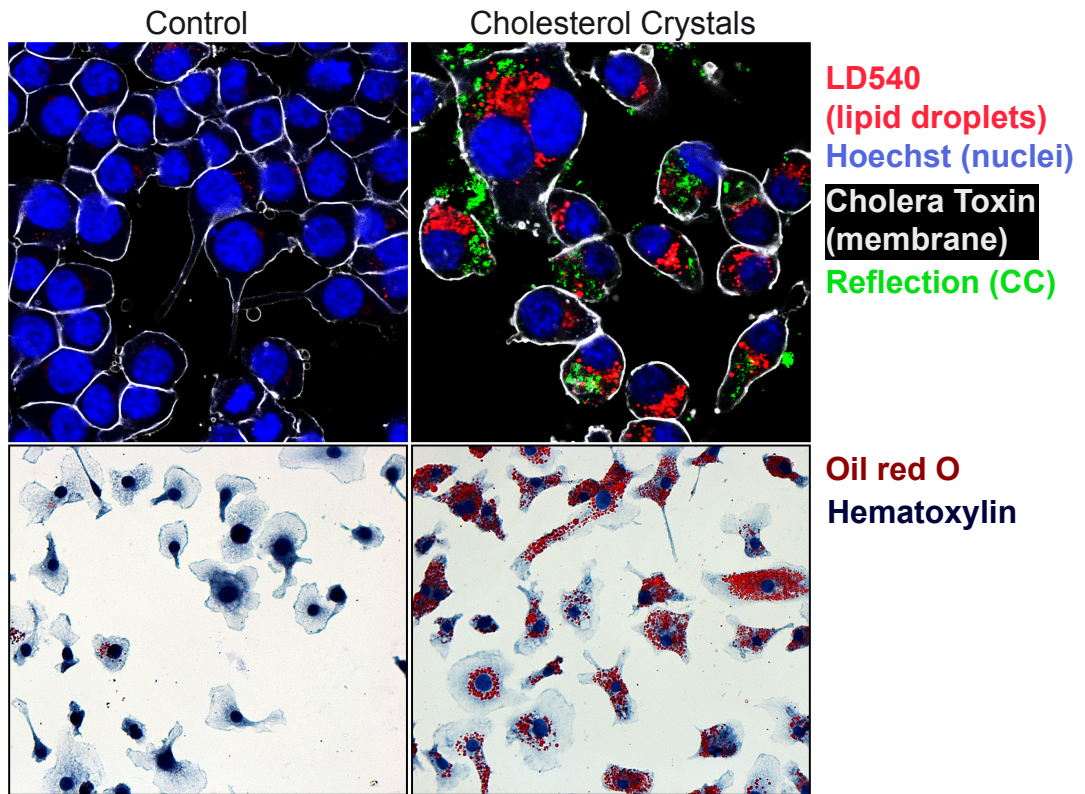

Fig. S5

**Fig. S5. CC loading of macrophages induces lipid droplet accumulation.** iMacs were loaded with 20  $\mu$ g CC for 3 h. To visualize lipid droplet formation, resting and CC-loaded macrophages were imaged following two different staining techniques. Top: Macrophages were stained for lipid droplets with LD540 (46) (red), for nuclei with Hoechst (blue) and the plasma membrane was stained with Alexa Fluor 647–coupled cholera toxin subunit B (white). The cells were imaged using confocal laser reflection microscopy; reflection signal of CCs (green). Bottom: Macrophages were stained for neutral triglycerides and lipids with Oil Red O (red), counterstained with Hematoxylin (dark blue).

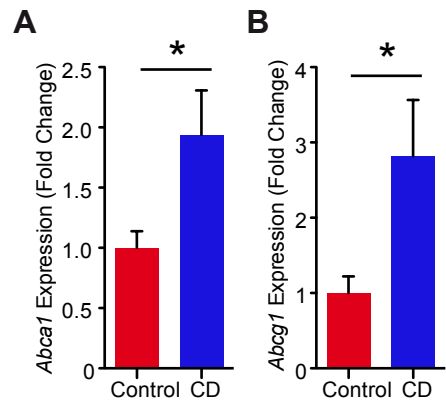

Fig. S6

**Fig. S6. CD treatment induces the expression of cholesterol efflux transporters in aortic arches of atherosclerotic mice.** Gene expression of (A) *Abcg1* and (B) *Abcg1* in aortic tissue of ApoE<sup>-/-</sup> mice after eight weeks of cholesterol-rich diet and concomitantly treated with 2 g CD/ kg body weight or vehicle control twice a week (n=7-8 per group). Data are shown as mean + s.e.m., Control vs. CD, unpaired two-tailed Student's t test; \*p < 0.05.

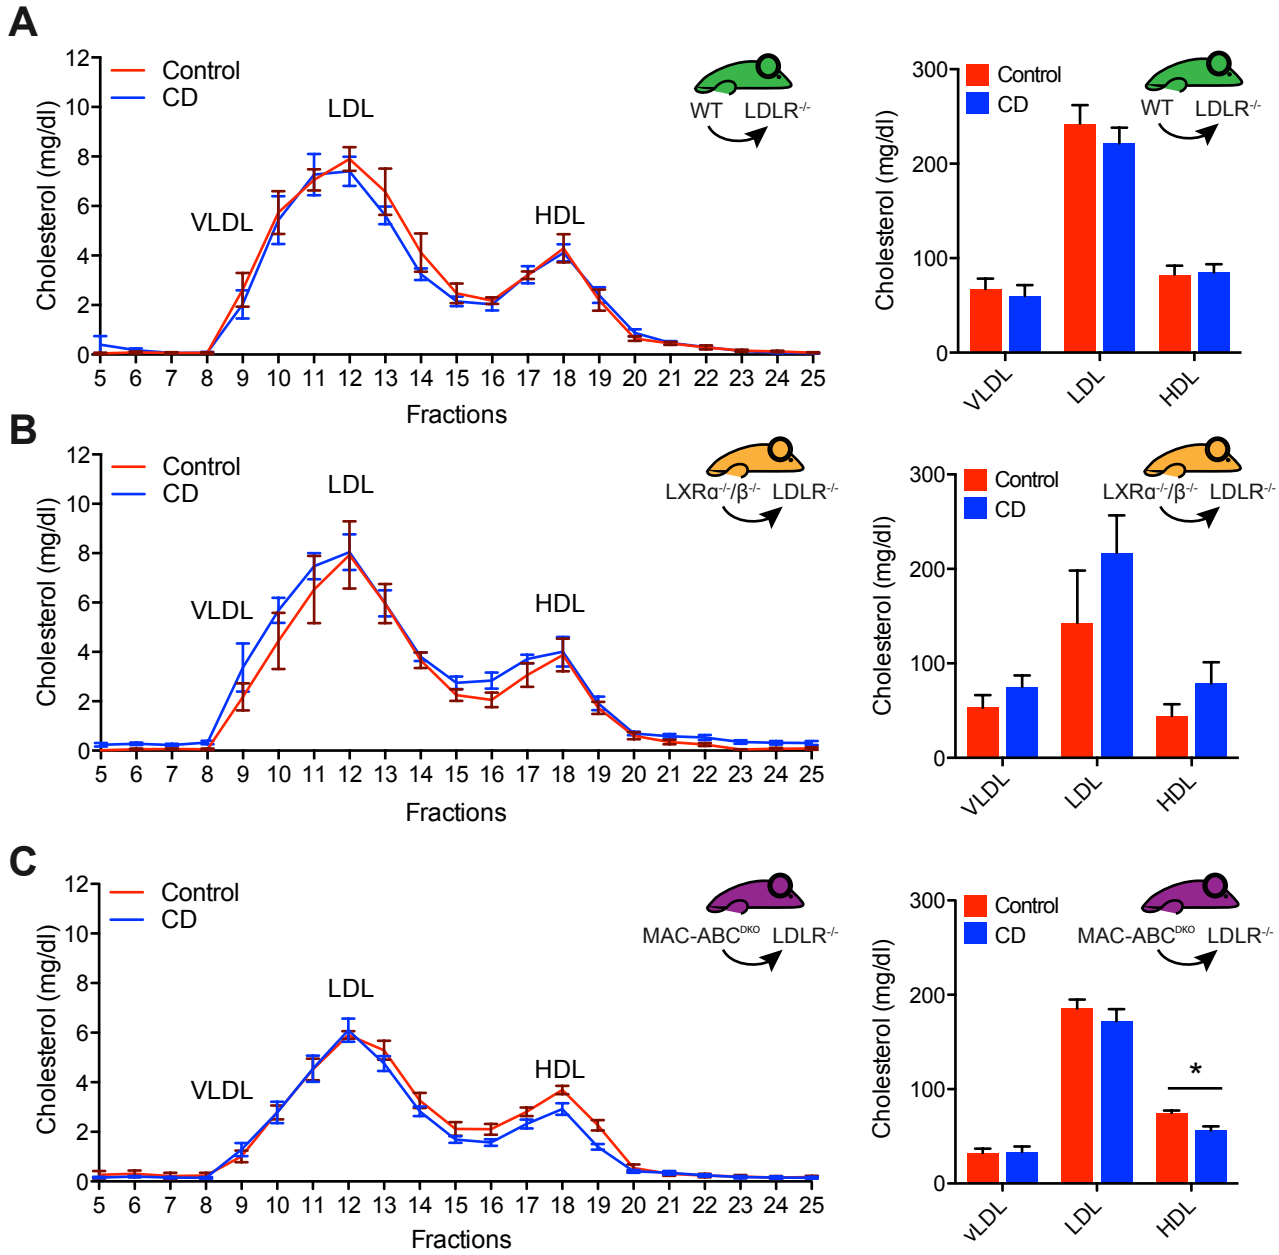

Fig. S7

**Fig. S7. CD treatment does not alter murine lipoprotein profiles.** Lipoprotein profiles of LDLR<sup>-/-</sup> mice transplanted with (A) WT, (B) LXR $\alpha$ <sup>-/-</sup> $\beta$ <sup>-/-</sup> or (C) MAC-ABC<sup>DKO</sup> bone marrow and fed a cholesterol-rich diet for eight weeks concomitantly treated with 2 g CD/ kg body weight or vehicle control twice a week (n=6-8 per group). Data are shown as mean + s.e.m. or mean +/- s.e.m.

**Table S1. LXR target gene list for GSEA analysis of BMDMs from WT and LXR $\alpha$ <sup>-/-</sup> $\beta$ <sup>-/-</sup> mice.** The list contains 533 unique LXR target genes identified in Heinz *et al.* (30) covered by the Illumina Array.

| LXR target gene names | Accession no.  |
|-----------------------|----------------|
| <i>Abcg1</i>          | NM_009593      |
| <i>2310035K24Rik</i>  | NM_027129.2    |
| <i>Col4a3bp</i>       | NM_023420.1    |
| <i>2310005P05Rik</i>  | NM_026189.2    |
| <i>Ptpro</i>          | NM_011216.2    |
| <i>Rgl1</i>           | NM_016846.3    |
| <i>Psap</i>           | NM_011179.2    |
| <i>5033414K04Rik</i>  | NM_001003948.1 |
| <i>Scd1</i>           | NM_009127.3    |
| <i>Cirbp</i>          | NM_007705.2    |
| <i>Stx8</i>           | NM_018768.2    |
| <i>Osgin1</i>         | NM_027950.1    |
| <i>Acsl3</i>          | NM_028817.2    |
| <i>1110032E23Rik</i>  | NM_133187.2    |
| <i>Klf9</i>           | NM_010638.4    |
| <i>2810439F02Rik</i>  | AK080904       |
| <i>Fbxo32</i>         | NM_026346.1    |
| <i>Acly</i>           | NM_134037.2    |
| <i>Chd9</i>           | NM_177224.1    |
| <i>Tmem86a</i>        | NM_026436.3    |
| <i>Sgk1</i>           | NM_011361.1    |
| <i>Ermp1</i>          | NM_001081213.1 |
| <i>Slc15a3</i>        | NM_023044.1    |
| <i>Cd28</i>           | NM_007642.2    |
| <i>Cpeb2</i>          | NM_175937.2    |
| <i>Irf8</i>           | NM_008320.3    |
| <i>Fut8</i>           | NM_016893.4    |
| <i>Scotin</i>         | NM_025858.1    |
| <i>Slc1a4</i>         | NM_018861.2    |
| <i>Sesn1</i>          | NM_001013370.1 |
| <i>D6Wsu176e</i>      | NM_138587.4    |
| <i>Sag</i>            | NM_009118.2    |
| <i>Acp2</i>           | NM_007387.1    |



|                      |                |
|----------------------|----------------|
| <i>Tlr4</i>          | NM_021297.1    |
| <i>Tmem120a</i>      | NM_172541.2    |
| <i>Endod1</i>        | NM_028013.2    |
| <i>Ccnd3</i>         | NM_007632.2    |
| <i>Tgfb2</i>         | AK090393       |
| <i>Nnat</i>          | AK077465       |
| <i>Bcar3</i>         | NM_013867.1    |
| <i>Fgd2</i>          | NM_013710.3    |
| <i>Cd63</i>          | NM_007653.1    |
| <i>2610307O08Rik</i> | XM_921606.2    |
| <i>Lrrk1</i>         | NM_146191.3    |
| <i>Snx27</i>         | NM_029721.1    |
| <i>Aebp2</i>         | AK045838       |
| <i>Traf3ip2</i>      | NM_134000.3    |
| <i>Abca1</i>         | NM_013454.3    |
| <i>Pdgfb</i>         | NM_011057.2    |
| <i>Chd2</i>          | NM_001081345.1 |
| <i>Tatdn2</i>        | NM_001033463.1 |
| <i>Lpin1</i>         | NM_015763      |
| <i>1700025G04Rik</i> | NM_197990.2    |
| <i>Atp1a1</i>        | NM_144900.1    |
| <i>Tnfaip2</i>       | NM_009396.1    |
| <i>6430548M08Rik</i> | NM_172286      |
| <i>Dusp6</i>         | NM_026268.2    |
| <i>Pik3ap1</i>       | NM_031376.2    |
| <i>Aldh4a1</i>       | NM_175438.3    |
| <i>Gpx1</i>          | NM_008160.5    |
| <i>3830408P04Rik</i> | NM_023647      |
| <i>Ripk5</i>         | NM_172516.4    |
| <i>Rheb</i>          | NM_053075.2    |
| <i>Fam129b</i>       | NM_146119.1    |
| <i>Mafk</i>          | NM_010757.2    |
| <i>2810046L04Rik</i> | NM_173382      |
| <i>Mylc2b</i>        | NM_023402.1    |
| <i>Ptgs1</i>         | NM_008969.3    |
| <i>Txnip</i>         | NM_023719.1    |
| <i>Hif1a</i>         | NM_010431.1    |
| <i>Tspan14</i>       | NM_145928.1    |
| <i>2010107E04Rik</i> | NM_027360.2    |
| <i>Ly86</i>          | NM_010745.1    |
| <i>Irf2</i>          | NM_008391.3    |
| <i>5430435G22Rik</i> | NM_145509.2    |
| <i>A530088I07Rik</i> | AK080244       |
| <i>Agpat4</i>        | NM_026644.1    |
| <i>Tmc6</i>          | NM_145439.1    |
| <i>Cyth4</i>         | NM_028195.3    |
| <i>4921513D23Rik</i> | NM_001081154   |

|                      |                |
|----------------------|----------------|
| <i>Atp2a2</i>        | NM_009722.2    |
| <i>Nob1</i>          | NM_026277.1    |
| <i>Ccdc109b</i>      | NM_025779.2    |
| <i>9430041J06Rik</i> | NM_001081045   |
| <i>Prkcd</i>         | NM_011103.2    |
| <i>Insr</i>          | AK052187       |
| <i>Bex6</i>          | NM_001033539.2 |
| <i>Slc15a4</i>       | NM_133895.1    |
| <i>Ptpns</i>         | NM_011218.1    |
| <i>Tmem17</i>        | NM_153596.1    |
| <i>Vac14</i>         | NM_146216.2    |
| <i>Prkar1a</i>       | NM_021880.2    |
| <i>Uck2</i>          | NM_030724.3    |
| <i>Sh3yl1</i>        | NM_013709.4    |
| <i>Erlin2</i>        | NM_153592.1    |
| <i>Cpsf6</i>         | NM_001013391.1 |
| <i>Bola3</i>         | NM_175277.2    |
| <i>Sdc1</i>          | NM_011519.2    |
| <i>Nrbf2</i>         | NM_001036293.2 |
| <i>N6amt1</i>        | NM_026366.1    |
| <i>Mylip</i>         | NM_153789.3    |
| <i>Bcat1</i>         | NM_007532.3    |
| <i>Aoah</i>          | NM_012054.2    |
| <i>Srebfl</i>        | NM_011480.1    |
| <i>Cdkn2aipnl</i>    | NM_029976.2    |
| <i>Ak2</i>           | NM_016895.3    |
| <i>Mdm1</i>          | NM_148922.2    |
| <i>Adcy7</i>         | NM_007406.1    |
| <i>Ikbke</i>         | NM_019777.3    |
| <i>Tnfaip3</i>       | NM_009397.2    |
| <i>Gng10</i>         | NM_025277.3    |
| <i>Adrbk1</i>        | NM_130863.1    |
| <i>Scd2</i>          | NM_009128.1    |
| <i>5730525O22Rik</i> | AK017789       |
| <i>Mtap7</i>         | NM_008635      |
| <i>Cdk6</i>          | NM_009873.2    |
| <i>Zzz3</i>          | NM_198416.2    |
| <i>Nfia</i>          | NM_177176.2    |
| <i>Maf</i>           | NM_001025577.2 |
| <i>Rbpj</i>          | NM_009035.4    |
| <i>B4galt5</i>       | NM_019835.2    |
| <i>Ccdc45</i>        | NM_177088.2    |
| <i>Dtnb</i>          | AK083752       |
| <i>Cd97</i>          | NM_011925.1    |
| <i>St6gal1</i>       | NM_145933.3    |
| <i>Pmp22</i>         | NM_008885.2    |
| <i>Clec2d</i>        | NM_053109.2    |

|                      |                |
|----------------------|----------------|
| <i>Luzp1</i>         | NM_024452.2    |
| <i>Grcc10</i>        | NM_013535.1    |
| <i>S100a6</i>        | NM_011313.2    |
| <i>Mrpl1</i>         | NM_053158.1    |
| <i>Ltbp1</i>         | AK054512       |
| <i>Klhdc4</i>        | NM_145605.1    |
| <i>Fasn</i>          | NM_007988.3    |
| <i>Tmem23</i>        | NM_144792.2    |
| <i>Nfkb2</i>         | NM_019408.1    |
| <i>Junb</i>          | NM_008416.1    |
| <i>Gpr68</i>         | NM_175493.2    |
| <i>9830002I17Rik</i> | XM_126365.3    |
| <i>Spp1</i>          | NM_009263.1    |
| <i>2700038C09Rik</i> | NM_025598.1    |
| <i>Rasgef1b</i>      | NM_181318.4    |
| <i>Prkcbp1</i>       | NM_027230.3    |
| <i>Med8</i>          | NM_020000.2    |
| <i>Usp7</i>          | NM_001003918.2 |
| <i>Tlr2</i>          | NM_011905.2    |
| <i>2310040G24Rik</i> | XM_001480154.1 |
| <i>Fndc7</i>         | NM_177091.2    |
| <i>Clstn3</i>        | NM_153508.3    |
| <i>Slc4a4</i>        | NM_018760.1    |
| <i>Epb7.2</i>        | NM_013515.1    |
| <i>Nfyb</i>          | NM_010914.2    |
| <i>Lrrc33</i>        | NM_146069.4    |
| <i>Vav3</i>          | NM_020505.2    |
| <i>Ptafr</i>         | XM_357441.1    |
| <i>Mdfic</i>         | NM_175088.3    |
| <i>6330442E10Rik</i> | NM_178745.3    |
| <i>Rapgef2</i>       | NM_001099624.1 |
| <i>Synpr</i>         | NM_028052.3    |
| <i>Il6ra</i>         | NM_010559.2    |
| <i>Phlpp</i>         | XM_129968.4    |
| <i>Reep3</i>         | NM_178606.4    |
| <i>Uchl4</i>         | NM_033607.1    |
| <i>Cdk5rap2</i>      | NM_145990.3    |
| <i>Taf5</i>          | NM_177342.3    |
| <i>2310045A20Rik</i> | NM_172710.3    |
| <i>Papd4</i>         | NM_133905.1    |
| <i>Pi4kb</i>         | NM_175356.1    |
| <i>Wnt5a</i>         | NM_009524.2    |
| <i>Fer1l3</i>        | XM_001480162.1 |
| <i>Prss2</i>         | NM_009430.1    |
| <i>Cd9</i>           | NM_007657.2    |
| <i>Cebpd</i>         | NM_007679.4    |
| <i>Ralgds</i>        | NM_009058.1    |

|                      |                |
|----------------------|----------------|
| <i>Entpd1</i>        | NM_009848      |
| <i>Wsb1</i>          | NM_001042565.2 |
| <i>Snx29</i>         | NM_028964.3    |
| <i>Nfe2l2</i>        | NM_010902.3    |
| <i>Gas7</i>          | NM_008088.1    |
| <i>Scd3</i>          | NM_024450.2    |
| <i>Mrpl33</i>        | NM_025796.2    |
| <i>Socs3</i>         | NM_007707.2    |
| <i>Gabpb2</i>        | NM_029885.1    |
| <i>AB124611</i>      | NM_206536.1    |
| <i>Dtd1</i>          | NM_025314.1    |
| <i>Lox</i>           | NM_010728.1    |
| <i>6330503K22Rik</i> | NM_182995.1    |
| <i>Cnot2</i>         | NM_028082.1    |
| <i>Icam2</i>         | NM_010494.1    |
| <i>Cxcl4</i>         | NM_019932.2    |
| <i>Ttpal</i>         | NM_029512.2    |
| <i>Plekho2</i>       | NM_153119.2    |
| <i>Dppa3</i>         | NM_139218.1    |
| <i>Asph</i>          | NM_133723.2    |
| <i>Stx7</i>          | NM_016797.4    |
| <i>Stard3nl</i>      | NM_024270.2    |
| <i>Eya3</i>          | NM_010166.2    |
| <i>Prrc1</i>         | NM_028447.2    |
| <i>Fhl3</i>          | AF114382       |
| <i>D930001I22Rik</i> | NM_173397      |
| <i>2210010L05Rik</i> | NM_133829.1    |
| <i>Syne2</i>         | NM_001005510.2 |
| <i>Abr</i>           | NM_198894.1    |
| <i>Creg1</i>         | NM_011804.2    |
| <i>Fcgr1</i>         | NM_010186.4    |
| <i>Il17rd</i>        | NM_134437.1    |
| <i>Cdc2l5</i>        | NM_001081058.1 |
| <i>Dpp3</i>          | NM_133803.1    |
| <i>Rhoc</i>          | NM_007484.1    |
| <i>Unc5b</i>         | NM_029770.2    |
| <i>5830415L20Rik</i> | NM_001042501.1 |
| <i>Arhgef10l</i>     | NM_172415.2    |
| <i>Atp5g3</i>        | NM_175015.2    |
| <i>Adk</i>           | NM_134079.1    |
| <i>Timm13</i>        | NM_013895.2    |
| <i>Adss</i>          | NM_007422.2    |
| <i>Zc3h11a</i>       | NM_144530.5    |
| <i>Prx</i>           | NM_198048.1    |
| <i>Ngrn</i>          | NM_031375.3    |
| <i>Tmem120b</i>      | NM_001039723.2 |
| <i>Prkag2</i>        | NM_145401.1    |

|                      |                |
|----------------------|----------------|
| <i>Ppp3r1</i>        | NM_024459.2    |
| <i>Atp13a3</i>       | XM_001480958.1 |
| <i>Eif2ak4</i>       | AK077199       |
| <i>Pfkfb2</i>        | NM_008825.3    |
| <i>Acsl4</i>         | NM_001033600.1 |
| <i>Zubr1</i>         | XM_001479450.1 |
| <i>2310043N10Rik</i> | NR_003513.2    |
| <i>Lass6</i>         | NM_172856.3    |
| <i>Coro6</i>         | NM_139128.1    |
| <i>Fkbp3</i>         | NM_013902.4    |
| <i>Ankrd55</i>       | NM_029898.2    |
| <i>Ddx50</i>         | NM_053183.1    |
| <i>Laptm4a</i>       | NM_008640.2    |
| <i>Lrrc28</i>        | NM_175124.4    |
| <i>Rara</i>          | NM_009024.2    |
| <i>Notch2</i>        | NM_010928.1    |
| <i>Rpl31</i>         | NM_053257.1    |
| <i>5031425E22Rik</i> | XM_149592.1    |
| <i>Atp8b4</i>        | XM_141343      |
| <i>H2afx</i>         | NM_010436.2    |
| <i>Emg1</i>          | NM_013536.1    |
| <i>Ssfa2</i>         | NM_080558      |
| <i>2610204M08Rik</i> | NM_198411.2    |
| <i>Akr1a4</i>        | NM_021473.2    |
| <i>Art3</i>          | NM_181728.1    |
| <i>E030010A14Rik</i> | NM_183160.3    |
| <i>Galnt9</i>        | NM_198306.1    |
| <i>Abca17</i>        | NM_001031621.1 |
| <i>Actn1</i>         | NM_134156.1    |
| <i>Tacc1</i>         | NM_199323.2    |
| <i>Zc3h12a</i>       | NM_153159.1    |
| <i>Muc1</i>          | NM_013605.1    |
| <i>Cnpy3</i>         | NM_028065.2    |
| <i>Hivep2</i>        | NM_010437.2    |
| <i>Cc2d1b</i>        | NM_177045.2    |
| <i>Eif4a2</i>        | NM_013506      |
| <i>Cmah</i>          | NM_007717.1    |
| <i>Zeb2</i>          | NM_015753.3    |
| <i>Cux1</i>          | NM_009986.3    |
| <i>Npm3-ps1</i>      | NR_002702.1    |
| <i>C5ar1</i>         | NM_007577.3    |
| <i>Adap2</i>         | NM_172133.1    |
| <i>Smad2</i>         | NM_133716.2    |
| <i>Tle4</i>          | NM_011600.2    |
| <i>Col17a1</i>       | NM_007732.1    |
| <i>Hoxa1</i>         | NM_010449.3    |
| <i>AI836003</i>      | NM_177716.2    |

|                      |                |
|----------------------|----------------|
| <i>Hal</i>           | NM_010401.3    |
| <i>Usp6nl</i>        | NM_181399.3    |
| <i>Olfir726</i>      | NM_146316      |
| <i>Wdfy3</i>         | NM_172882      |
| <i>Myo3b</i>         | XM_194023.1    |
| <i>Erh</i>           | NM_007951.1    |
| <i>Rps19bp1</i>      | NM_175109.3    |
| <i>Btg2</i>          | NM_007570.2    |
| <i>Dcbl2</i>         | NM_028523.3    |
| <i>Ttc9</i>          | NM_001033149.2 |
| <i>Mrpl2</i>         | NM_025302.3    |
| <i>Birc6</i>         | AK086619       |
| <i>Itgb1</i>         | NM_010578.1    |
| <i>Nup160</i>        | NM_021512.2    |
| <i>Mnt</i>           | NM_010813.2    |
| <i>Emp1</i>          | NM_010128.4    |
| <i>Bcl7b</i>         | NM_009745.1    |
| <i>Nfatc4</i>        | NM_023699.2    |
| <i>Creb3l2</i>       | NM_178661.3    |
| <i>Gtf2e1</i>        | NM_028812.3    |
| <i>Ado</i>           | NM_001005419.1 |
| <i>Atp5l</i>         | NM_013795.4    |
| <i>3110003A17Rik</i> | NM_028440.1    |
| <i>1700017N19Rik</i> | XM_487140      |
| <i>Cltc</i>          | NM_001003908   |
| <i>Cdca3</i>         | NM_013538.4    |
| <i>Dhx35</i>         | NM_145742.1    |
| <i>Aldh9a1</i>       | NM_019993.3    |
| <i>Sall4</i>         | NM_175303.3    |
| <i>Tipr1</i>         | NM_145513.3    |
| <i>Bbc3</i>          | NM_133234.1    |
| <i>Jph1</i>          | NM_020604.1    |
| <i>Zfand3</i>        | NM_148926.2    |
| <i>Gdi2</i>          | NM_008112.4    |
| <i>Tex14</i>         | NM_031386.1    |
| <i>Nuak1</i>         | NM_001004363.1 |
| <i>Rffl</i>          | NM_001007465.1 |
| <i>Slc5a3</i>        | NM_017391.2    |
| <i>Cntnap5a</i>      | NM_001077425.1 |
| <i>Egr3</i>          | NM_018781      |
| <i>Gpatch4</i>       | NM_025663.2    |
| <i>Ggnbp1</i>        | NM_027544.1    |
| <i>Il20ra</i>        | NM_172786.1    |
| <i>2310005N03Rik</i> | NM_025511.2    |
| <i>Opn5</i>          | NM_181753.2    |
| <i>8430432M10Rik</i> | NM_176831.2    |
| <i>Gm826</i>         | NM_001033411.1 |

|                      |                |
|----------------------|----------------|
| <i>Lyzl4</i>         | NM_026915.2    |
| <i>1700012B15Rik</i> | NM_028796      |
| <i>Col22a1</i>       | XM_907370.3    |
| <i>H2-Q1</i>         | NM_010390.2    |
| <i>Prnpip1</i>       | NM_080469.2    |
| <i>Mgat5</i>         | NM_145128.3    |
| <i>Slpr1</i>         | NM_007901.4    |
| <i>Lass2</i>         | NM_029789.1    |
| <i>Alad</i>          | NM_008525.3    |
| <i>Mppe1</i>         | NM_172630.1    |
| <i>Zc3h14</i>        | NM_029334.1    |
| <i>Ifnar2</i>        | NM_010509.1    |
| <i>Tmem119</i>       | NM_146162.1    |
| <i>St6galnac6</i>    | NM_001025311.1 |
| <i>Sepn1</i>         | NM_029100.2    |
| <i>Veph1</i>         | NM_145820.1    |
| <i>Dirc2</i>         | NM_153550.3    |
| <i>Gucy2g</i>        | NM_001081076.1 |
| <i>Tsen2</i>         | NM_199033.1    |
| <i>C130026I21Rik</i> | NM_175219.3    |
| <i>Gsx1</i>          | NM_008178.2    |
| <i>Slc7a1</i>        | NM_007513.3    |
| <i>Txndc11</i>       | NM_134105.2    |
| <i>Plce1</i>         | NM_019588.2    |
| <i>1700112H15Rik</i> | XM_149010.2    |
| <i>Tmem41b</i>       | NM_153525.5    |
| <i>Cdca1</i>         | NM_023284.1    |
| <i>Gm71</i>          | NM_001033236.2 |
| <i>AI427809</i>      | NM_001033454.1 |
| <i>Grk5</i>          | NM_018869.2    |
| <i>B3galnt1</i>      | NM_020026.2    |
| <i>Gda</i>           | AK044078       |
| <i>Cps1</i>          | NM_001080809.1 |
| <i>Esr1</i>          | NM_007956.4    |
| <i>5430405G24Rik</i> | XM_152907.3    |
| <i>Hnt</i>           | NM_172290.3    |
| <i>March7</i>        | NM_020575.2    |
| <i>Nomo1</i>         | NM_153057.3    |
| <i>Sfpi1</i>         | NM_011355.1    |
| <i>Tm7sf3</i>        | NM_026281.2    |
| <i>1600014C10Rik</i> | NM_028166.3    |
| <i>Brms1</i>         | NM_134155.1    |
| <i>Hells</i>         | NM_008234.3    |
| <i>Fndc3b</i>        | NM_173182.1    |
| <i>Axl</i>           | NM_009465.3    |
| <i>2810474O19Rik</i> | NM_026054.2    |
| <i>6530418L21Rik</i> | NM_175398.3    |

|                      |                |
|----------------------|----------------|
| <i>Phtf2</i>         | NM_172992.2    |
| <i>Leprel2</i>       | NM_013534.4    |
| <i>Cenpn</i>         | NM_028131.3    |
| <i>Tdrd7</i>         | NM_146142.1    |
| <i>Arid1a</i>        | NM_033566.1    |
| <i>Dusp14</i>        | NM_019819.3    |
| <i>Cic</i>           | NM_027882.2    |
| <i>Ifnab</i>         | NM_008336.2    |
| <i>1700027L20Rik</i> | XM_906114.3    |
| <i>Cd19</i>          | NM_009844.2    |
| <i>Sfl</i>           | NM_011750.1    |
| <i>1700011E24Rik</i> | XM_128789.5    |
| <i>Terf2ip</i>       | NM_020584.1    |
| <i>Ogg1</i>          | NM_010957.3    |
| <i>Tmem69</i>        | NM_177670.3    |
| <i>Casc1</i>         | NM_177222.3    |
| <i>Lpl</i>           | NM_008509.2    |
| <i>Gm572</i>         | NM_001085505.1 |
| <i>Itpkc</i>         | NM_181593.2    |
| <i>Crat</i>          | NM_007760.3    |
| <i>1700019M22Rik</i> | NM_027076.2    |
| <i>Akna</i>          | NM_001045514.1 |
| <i>Fam176b</i>       | NM_172145.3    |
| <i>Itpr2</i>         | NM_010586.1    |
| <i>Slc7a14</i>       | NM_172861.2    |
| <i>Bcl2l1</i>        | NM_009743.4    |
| <i>BC006965</i>      | NM_146031      |
| <i>Cryga</i>         | NM_007774.3    |
| <i>Fli1</i>          | NM_008026.4    |
| <i>Selk</i>          | NM_019979.1    |
| <i>Clca5</i>         | NM_178697.4    |
| <i>Osbp19</i>        | NM_173350.1    |
| <i>Lpcat3</i>        | NM_145130.1    |
| <i>1500035H01Rik</i> | NM_023831.3    |
| <i>Zfp644</i>        | NM_026856.2    |
| <i>2310033K02Rik</i> | NM_001080708.1 |
| <i>B3gat1</i>        | NM_029792.1    |
| <i>Nubpl</i>         | NM_029760.1    |
| <i>March8</i>        | NM_027920.4    |
| <i>Sergef</i>        | NM_013789.1    |
| <i>Slc30a6</i>       | NM_144798.4    |
| <i>3110023E09Rik</i> | AK014071       |
| <i>Foxc1</i>         | NM_008592.2    |
| <i>Cln6</i>          | NM_001033175.1 |
| <i>D4Ertd196e</i>    | XM_975887.1    |
| <i>1810019J16Rik</i> | NM_001083916.1 |
| <i>Ube2i</i>         | NM_011665.3    |



|                      |                |
|----------------------|----------------|
| <i>Clec4d</i>        | NM_010819.3    |
| <i>A430090L17Rik</i> | NM_177004      |
| <i>Sspn</i>          | NM_010656.2    |
| <i>Pim1</i>          | NM_008842.3    |
| <i>Tatdn1</i>        | NM_175151.2    |
| <i>Uqcrc2</i>        | NM_025899.2    |
| <i>Lrp1</i>          | NM_008512.2    |
| <i>Tnrc4</i>         | NM_172434.2    |
| <i>Maz</i>           | XM_133827.2    |
| <i>Etv6</i>          | NM_007961.3    |
| <i>Arl6ip6</i>       | NM_022989.2    |
| <i>Atp8b2</i>        | NM_001081182.1 |
| <i>Cetn1</i>         | NM_007593.5    |
| <i>Iqch</i>          | XM_981814.1    |
| <i>Spink10</i>       | NM_177829.3    |
| <i>C230095G01Rik</i> | NM_178768.3    |
| <i>Grin2b</i>        | NM_008171.3    |
| <i>Mmp9</i>          | NM_013599.2    |
| <i>Hsd11b1</i>       | NM_008288.1    |
| <i>Wipf2</i>         | NM_197940.1    |
| <i>Ncf4</i>          | NM_008677.1    |
| <i>4932443I19Rik</i> | XM_980156.1    |
| <i>Dr1</i>           | NM_026106.4    |
| <i>C730024G19Rik</i> | XM_921354.2    |
| <i>Tmc1</i>          | NM_028953.2    |
| <i>Eps8</i>          | NM_007945.2    |
| <i>Efnal</i>         | NM_010107.3    |
| <i>Ptp4a2</i>        | NM_008974.2    |
| <i>Pacrgl</i>        | NM_025755.3    |
| <i>4932425I24Rik</i> | NM_001081025.1 |
| <i>Slc6a14</i>       | NM_020049.3    |
| <i>Arf2</i>          | NM_007477.4    |
| <i>Prr13</i>         | NM_025385.2    |
| <i>4930543E12Rik</i> | XM_922816      |
| <i>Edem1</i>         | NM_138677.2    |
| <i>D1Ert471e</i>     | NM_001164528   |
| <i>Nsl1</i>          | NM_198654.2    |
| <i>Rnf186</i>        | NM_025786.2    |
| <i>Ptchd3</i>        | XM_109751.6    |
| <i>Smg7</i>          | NM_001005507.1 |
| <i>Wdr36</i>         | NM_144863.3    |
| <i>BC017158</i>      | NM_145590.1    |
| <i>Gapdh</i>         | NM_008084.2    |
| <i>Rps20</i>         | NM_026147      |
| <i>Chmp4b</i>        | NM_029362.3    |
| <i>2310028O11Rik</i> | XM_901483.3    |
| <i>Dip2c</i>         | NM_001081426.1 |

|                           |                |
|---------------------------|----------------|
| <i>Igsf3</i>              | NM_207205.1    |
| <i>Pon1</i>               | NM_011134.2    |
| <i>OTTMUSG00000000997</i> | NM_001037932.1 |
| <i>Fcer1g</i>             | NM_010185.2    |
| <i>Olfir951</i>           | NM_001011812.1 |
| <i>Cct5</i>               | NM_007637.2    |
| <i>Rps27a</i>             | NM_001033865.1 |
| <i>4930522O17Rik</i>      | XM_898933.3    |
| <i>Diap2</i>              | NM_017398.2    |
| <i>Fmnl1</i>              | NM_019679.2    |
| <i>1200011M11Rik</i>      | NM_024262.1    |
| <i>Bckdhb</i>             | NM_199195.1    |
| <i>Htr6</i>               | NM_021358.1    |
| <i>Galnt4</i>             | NM_015737.3    |
| <i>Olfir586</i>           | NM_147111.1    |
| <i>Scnn1a</i>             | NM_011324.1    |
| <i>Dpp10</i>              | NM_199021.2    |
| <i>Scg5</i>               | NM_009162.3    |
| <i>Exoc2</i>              | NM_025588.2    |
| <i>Elovl5</i>             | NM_134255.2    |
| <i>Trcg1</i>              | NM_001014398.1 |
| <i>Dlx1as</i>             | NR_002854.1    |
| <i>Tmem16b</i>            | NM_153589.1    |
| <i>Zfp364</i>             | NM_026406.2    |
| <i>Zc3h6</i>              | NM_178404.2    |
| <i>Grm4</i>               | NM_001013385.1 |
| <i>Ppp1r9b</i>            | NM_172261.2    |
| <i>Gh</i>                 | NM_008117.2    |
| <i>Phospho1</i>           | NM_153104.2    |
| <i>4930546C10Rik</i>      | XM_484744      |
| <i>Sh3bgrl3</i>           | NM_080559.1    |
| <i>Zmat5</i>              | NM_026015.2    |
| <i>Cngb3</i>              | NM_013927.2    |
| <i>Hip1</i>               | NM_146001      |
| <i>2310011J03Rik</i>      | NM_025521.3    |
| <i>Rassf8</i>             | NM_027760.2    |
| <i>Arl4d</i>              | NM_031160.1    |
| <i>Morn4</i>              | NM_198108.2    |
| <i>Mef2d</i>              | NM_133665.3    |
| <i>Mgst3</i>              | NM_025569.1    |
| <i>Ctsd</i>               | NM_009983.2    |
| <i>Gm528</i>              | XM_986482.1    |
| <i>Bms1</i>               | NM_194339.1    |
| <i>Slc13a4</i>            | NM_172892.1    |
| <i>Bard1</i>              | NM_007525.2    |
| <i>Cd5l</i>               | NM_009690.1    |
| <i>Npffr1</i>             | XM_905368.1    |

|                      |                |
|----------------------|----------------|
| <i>Pltp</i>          | NM_011125.2    |
| <i>2610209M04Rik</i> | NM_025665.1    |
| <i>1700010C24Rik</i> | NM_027401.2    |
| <i>Ctss</i>          | NM_021281.1    |
| <i>Il6</i>           | NM_031168.1    |
| <i>Ubash3b</i>       | NM_176860.5    |
| <i>Pgs1</i>          | NM_133757.2    |
| <i>Ror1</i>          | NM_013845.4    |
| <i>Cyp26b1</i>       | NM_175475.2    |
| <i>Psmab</i>         | NM_011968.2    |
| <i>Kpna2</i>         | NM_010655.3    |
| <i>Myo16</i>         | NM_001081397.1 |
| <i>Mllt6</i>         | NM_139311.2    |
| <i>S100a7a</i>       | NM_199422.1    |
| <i>Sec22b</i>        | NM_011342.2    |
| <i>Gltf</i>          | NM_019821.2    |
| <i>Ssbp4</i>         | NM_133772.1    |
| <i>1600002D24Rik</i> | XM_001473403.1 |
| <i>Gad2</i>          | NM_008078.1    |
| <i>Oxal1</i>         | NM_026936.3    |
| <i>1600014C23Rik</i> | XM_128667.1    |
| <i>Commd4</i>        | NM_025417.1    |
| <i>Frrs1</i>         | NM_009146.1    |
| <i>4933402G07Rik</i> | AK016617       |
| <i>Chsy1</i>         | NM_001081163.1 |
| <i>Mnd1</i>          | NM_029797.1    |
| <i>Setdb1</i>        | NM_018877.2    |
| <i>Spry4</i>         | NM_011898.2    |
| <i>Mtx2</i>          | NM_016804.2    |
| <i>Prl4a1</i>        | NM_011165.3    |

**Table S2. List of additional metabolic and regulatory genes (nCounter Panel Plus).** The nCounter GX Human Immunology Kit v2 (Nanostring Technologies) was extended by probes for 30 additional genes.

| <b>Gene names</b> | <b>Accession no.</b> |
|-------------------|----------------------|
| <i>ABCA1</i>      | NM_005502.2          |
| <i>ABCG1</i>      | NM_207174.1          |
| <i>ACAT1</i>      | NM_000019.2          |
| <i>APOA1</i>      | NM_000039.1          |
| <i>APOE</i>       | NM_000041.2          |
| <i>BIRC2</i>      | NM_001166.3          |
| <i>BIRC3</i>      | NM_182962.1          |

|                 |                |
|-----------------|----------------|
| <i>CASP5</i>    | NM_004347.1    |
| <i>CETP</i>     | NM_000078.2    |
| <i>CYP27A1</i>  | NM_000784.3    |
| <i>CYP7A1</i>   | NM_000780.3    |
| <i>HSP90AA1</i> | NM_001017963.2 |
| <i>HSP90AB1</i> | NM_007355.2    |
| <i>HSP90B1</i>  | NM_003299.1    |
| <i>LPL</i>      | NM_000237.2    |
| <i>MAP3K7</i>   | NM_145333.1    |
| <i>NFKB1B</i>   | NM_002503.3    |
| <i>NLRC4</i>    | NM_021209.3    |
| <i>NLRP1</i>    | NM_033004.2    |
| <i>NR1H2</i>    | NM_007121.4    |
| <i>NR1H3</i>    | NM_005693.2    |
| <i>PLTP</i>     | NM_006227.2    |
| <i>PPARD</i>    | NM_006238.4    |
| <i>PSTPIP1</i>  | NM_003978.3    |
| <i>PYDC1</i>    | NM_152901.2    |
| <i>RIPK2</i>    | NM_003821.5    |
| <i>SCARB1</i>   | NM_005505.3    |
| <i>SLC2A4</i>   | NM_001042.2    |
| <i>SREBF1</i>   | NM_001005291.1 |
| <i>SUGT1</i>    | NM_006704.3    |

**Table S3. LXR target gene list for GSEA analysis of human atherosclerotic plaques.** The list contains direct LXR target genes identified in Pehkonen *et al.* (54) covered by the nCounter GX Human Immunology Kit v2 (Nanostring Technologies) and the 30 additional genes (Supplementary Table 2).

| <b>LXR target gene names</b> | <b>Accession no.</b> |
|------------------------------|----------------------|
| <i>ABCA1</i>                 | NM_005502.2          |
| <i>ABCG1</i>                 | NM_207174.1          |
| <i>ABL1</i>                  | NM_005157.3          |
| <i>BAX</i>                   | NM_138761.3          |
| <i>BID</i>                   | NM_001196.2          |
| <i>BIRC2</i>                 | NM_001166.3          |
| <i>CCR6</i>                  | NM_031409.2          |
| <i>CD276</i>                 | NM_001024736.1       |
| <i>CD44</i>                  | NM_001001392.1       |
| <i>CD58</i>                  | NM_001779.2          |

|                 |                |
|-----------------|----------------|
| <i>CD82</i>     | NM_002231.3    |
| <i>CEBPB</i>    | NM_005194.2    |
| <i>DUSP4</i>    | NM_057158.2    |
| <i>EGR1</i>     | NM_001964.2    |
| <i>ETS1</i>     | NM_005238.3    |
| <i>FADD</i>     | NM_003824.2    |
| <i>GNLY</i>     | NM_006433.2    |
| <i>HLA-DRB1</i> | NM_002124.2    |
| <i>HSP90AA1</i> | NM_001017963.2 |
| <i>ICAM3</i>    | NM_002162.3    |
| <i>IL1RN</i>    | NM_000577.3    |
| <i>IRF5</i>     | NM_002200.3    |
| <i>ITGAX</i>    | NM_000887.3    |
| <i>LILRB3</i>   | NM_006864.2    |
| <i>MCL1</i>     | NM_021960.3    |
| <i>MIF</i>      | NM_002415.1    |
| <i>NFATC3</i>   | NM_004555.2    |
| <i>NLRP3</i>    | NM_001079821.2 |
| <i>NR1H3</i>    | NM_005693.2    |
| <i>PRDM1</i>    | NM_001198.3    |
| <i>PRKCD</i>    | NM_006254.3    |
| <i>PSMB8</i>    | NM_004159.4    |
| <i>PTGER4</i>   | NM_000958.2    |
| <i>RPL19</i>    | NM_000981.3    |
| <i>S100A8</i>   | NM_002964.3    |
| <i>S100A9</i>   | NM_002965.2    |
| <i>SDHA</i>     | NM_004168.1    |
| <i>SMAD5</i>    | NM_005903.5    |
| <i>STAT3</i>    | NM_139276.2    |
| <i>TGFBR2</i>   | NM_001024847.1 |
| <i>TNF</i>      | NM_000594.2    |
| <i>TRAF3</i>    | NM_145725.1    |
| <i>TUBB</i>     | NM_178014.2    |
| <i>XBPI</i>     | NM_005080.2    |

**Table S4. Original data of all figures.** Microsoft Excel spreadsheet including all original data and exact p-values of significant results.

**Reviewer: 1**

***This is an impressive study investigating the regression of atherosclerosis by cyclodextrins. The authors demonstrate an LXR-dependent macrophage programming and production of 27OH in macrophages as well as reverse cholesterol transport and their effects on atherosclerosis regression.***

Thank you very much for your kind words of encouragement.

***1. The authors typically use 10mM cyclodextrin with macrophages in their cell systems. In a buffer system this will typically be cytotoxic and cause major losses of cell protein. If used in serum, the toxicity may be less- but this is never made explicit anywhere in figures. The cyclodextrin will catalyze cholesterol and oxysterol movement from serum and to serum (see Atger et al ref 16), which will differ from the results in a buffer. This changes the interpretation of a number of figures- the authors should clarify the following:***

***a. Fig 3F What is cell protein after 10mM cyclodextrin, and is the expression of crystal area reduced when expressed per cell protein?***

***b. Fig 4 B-H. Please clarify the incubation media into which cyclodextrin was added - PBS or HDL or serum- for each panel. In Materials and Methods (Analysis of crystal-derived cholesterol in macrophages) synthetic HDL was used with cyclodextrin to measure efflux- please indicate which figures this combination was used- the use of HDL with cyclodextrin is qualitatively and quantitatively different to the use of cyclodextrin alone- see Atger et al 16.***

*We would like to address these questions together in detail:*

*Regarding the CD toxicity in our cell stimulation system:* We specifically chose 10 mM CD for our *in vitro* experiments because we had determined it to be below the toxicity threshold under the experimental conditions we have used in the studies reported in this manuscript. We have now incorporated viability assays of macrophages incubated with increasing CD concentrations into the revised manuscript as a new Supplementary Fig 3 (see also pasted in this letter below).

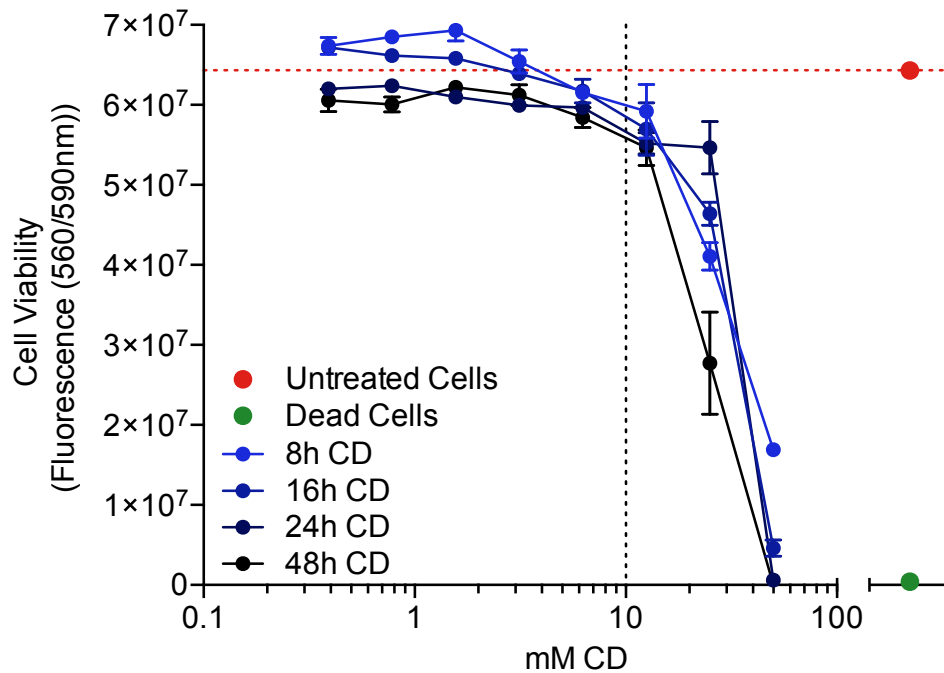

*Regarding the protein levels for Fig. 3F:* Protein levels were not measured in the experiments, as we have no indication that we lose cells during the treatment. As stated above, 10 mM CD does not affect viability of macrophages. Furthermore, the main purpose of Figure 3F is to illustrate that CD rapidly mediates intracellular CC dissolution, a finding that can be directly visualized in living cells. For the reviewer, we have provided screen captures from a simple light microscopic video acquisition of iMacs after incubation with CC (Before) and “After 4h CD” treatment. The images clearly highlight the rapid CD mediated intracellular CC dissolution. Of note, the video shows that the cells are still moving after 4 h of treatment, which is an indication that they remain viable throughout the observation period. We have also appended a video that documents this. This video is not part of the manuscript.

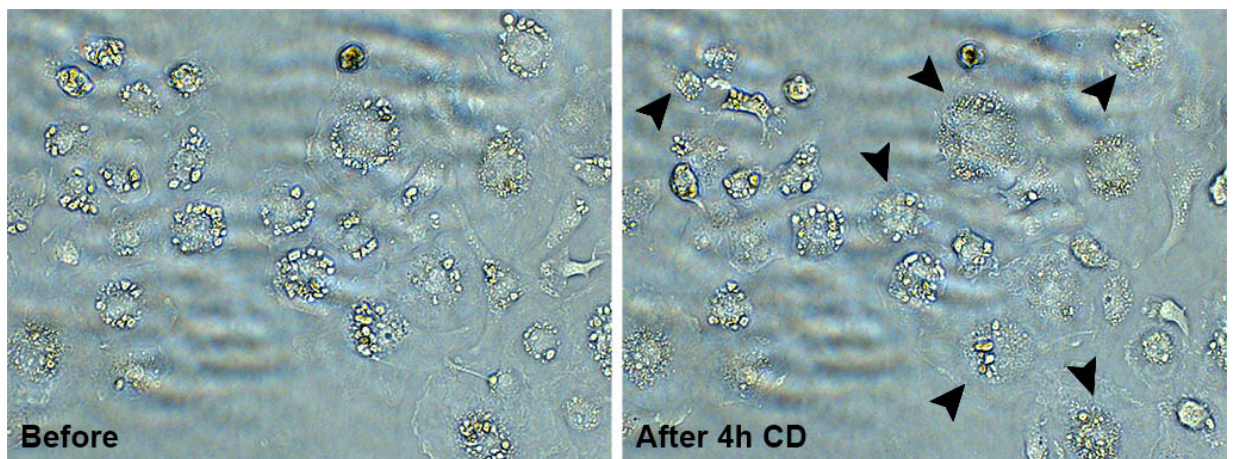

*Regarding the dissolution of crystal area per cell:* In the manuscript we opted to represent how CD mediates loss of total crystal area (Fig. 3F). After feeding of crystals the macrophage cultures were washed and no extracellular crystals remained visible. Hence, the total crystal area represents intracellular crystals.

As further evidence we have now also included confocal images and quantification of intracellular CC dissolution per cell after 24h of 10 mM CD incubation. This figure (pasted here below) is now Supplementary Fig. 4 in the revised manuscript.

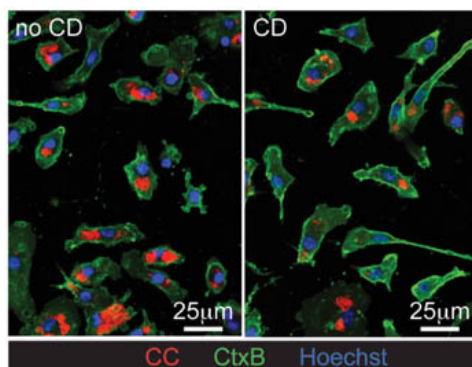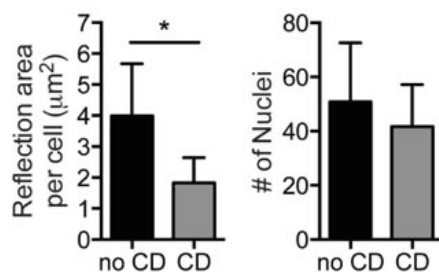

*Regarding the medium used for these experiments:* As stated in the Materials and Methods section: “Immortalized mouse macrophages from wild type C57BL/6 mice were cultured in DMEM supplemented with 10% fetal calf serum (FCS) and 10 μg / ml Ciprobay-



500 (Bayer)“.

We apologize for the confusing statement in the “Analysis of crystal-derived cholesterol in macrophages”. The sentence referred to an experiment in a previous version of the manuscript, but none of the experiments shown in the current form include reconstituted HDL. As has been previously described (1), HDL can augment the cholesterol efflux capacity of CD. We had performed an experiment confirming these results, but have excluded it from the current manuscript because we felt it did not contribute to the overall story or provided novel insight. The sentence has been removed from the materials section.

**2. If cyclodextrin promotes the production of 27OH, can the authors report on the production of other oxysterols? What does cyclodextrin do to Cyp27A1 activity? Is 27OH relevant to the LXR effect? What happens if cyclodextrin is added to cells deficient in Cyp27A1? Are LXR pathways still activated?**

Thank you very much for the interesting question. We have now also measured the production of other endogenous LXR agonists including 24-hydroxycholesterol and desmosterol in response to CC and CD incubation and found mainly 27-hydroxycholesterol to be affected by CD treatment. These data suggest that CD primarily influences the production of 27-hydroxycholesterol in macrophages. See data below.

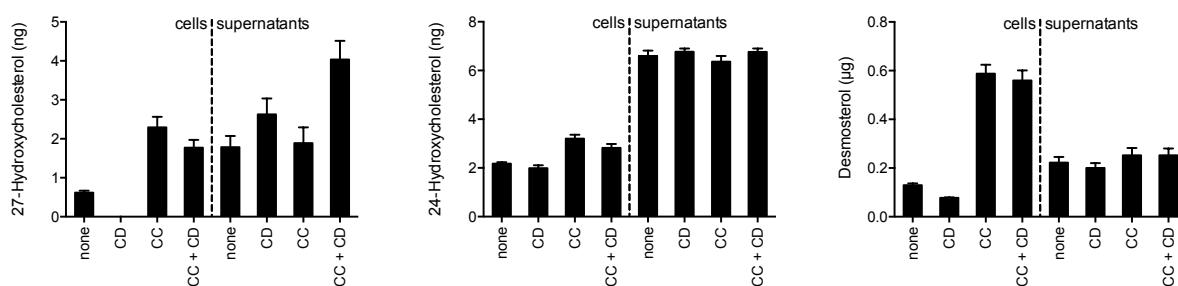

Interestingly, CD does not influence Cyp27A1 expression in CC-loaded BMDMs while oxysterols are produced in the same cells (see below). This implies that CD either provides more substrate for Cyp27A1 to the local site of oxysterol production or increases the rate of enzymatic production or both.

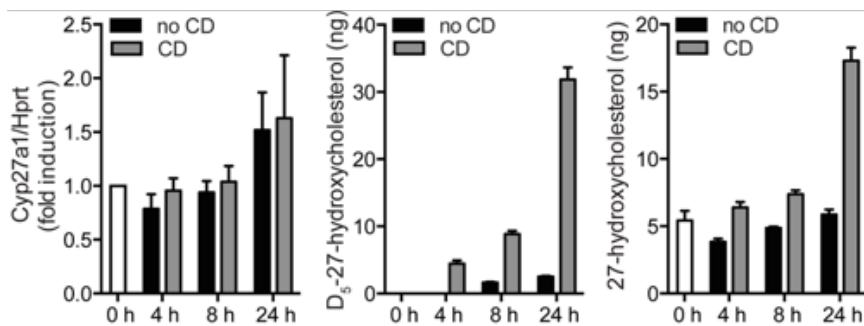

The atheroprotective effects of CD are most likely multifactorial and are not solely dependent on 27-hydroxycholesterol-mediated LXR agonism. In the manuscript we propose several potential pathways including increasing cholesterol solubility and cholesterol excretion, changed extrahepatic macrophage cholesterol metabolism and decreased local anti-inflammatory effects.

In response to the reviewer's suggestion, we have now investigated ABCA1 protein expression in Cyp27A1 knockout BMDM and found a decreased response to CD treatment (see below WB analysis of three individual mice per genotype - densitometric analysis, mean plus SEM). However, to discern the exact role of Cyp27A1 in this context goes beyond the scope of the manuscript, especially since the role of Cyp27A1 in atherogenesis is not fully understood and very complex due to different functions in different cell types (2).

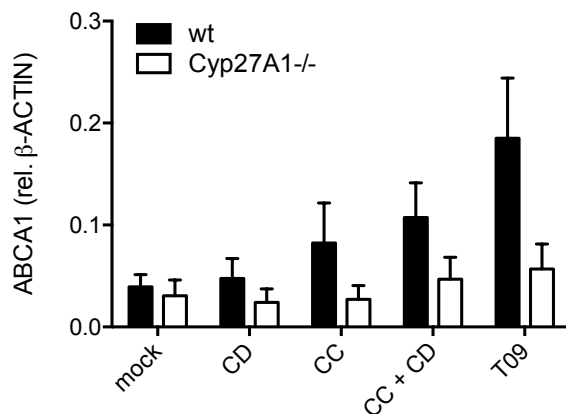

**3. The number of macrophages in the plaque was unaffected by cyclodextrin yet inflammation was reduced as indicated by IL1 and by ROS (Figure 1 E-J). Please discuss non macrophage-mediated regulation of inflammation. Are there other examples of macrophage number being unaltered but plaque inflammation being reduced for comparison or is this a unique phenotype?**

CD both decreases absolute macrophage numbers and has anti-inflammatory effects on

plaque macrophages. Figure 1F depicts CD68 positive staining area **in relation** to total plaque area. It is therefore a measure of relative plaque composition. But because total plaque area is reduced in CD treated mice, total CD68 positive staining i.e. absolute macrophage number is also reduced (see below).

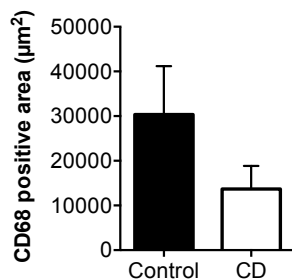

Decreased inflammation can thus be attributed to a fewer absolute number of plaque macrophages. Additionally, CD has significant anti-inflammatory effects on human and murine atherosclerotic plaques Fig. 7-8 via LXR agonism. We have rephrased the results section to highlight this point more clearly.

**Reviewer: 2**

***The manuscript by Zimmer et al explores the ability of cyclodextrin (CD) to dissolve cholesterol crystals and promote regression of atherosclerosis via LXRs. This is an interesting study that demonstrates that solubilizing cholesterol crystals promotes LXR ligand formation, reverse cholesterol transport via ABC transporters and a concomitant anti-inflammatory response to reduce plaque formation. They also showed that this is in part due to a reduction in ROS. Importantly the authors also show that this occurs in human plaques and that cholesterol excretion in urine can be demonstrated in humans taking CD. Overall this is a well-executed study and the conclusions drawn are largely consistent with the data. However, there are several areas in need of more explanation and some additional experiments that would help clarify the mechanism underlying the phenomena.***

We greatly appreciate your constructive comments and thank you for the positive feedback.

***One concern is that the CD is working through a pathway other than via the solubility of cholesterol crystals, oxysterol production and LXR activation. It appears that in some***

***cases there is a lack of association between a reduction in cholesterol crystals and a reduction in plaque area. In Figure 2D switching to chow diet reduced cholesterol crystals significantly but did not affect plaque area (compare Fig 2C control (red bar) with Fig 2D control (red bar). This suggests either a very steep threshold in the reduction of cholesterol crystals by CD to promote regression or that the CD treatment is doing something more than just reducing cholesterol crystals to reduce plaque formation. This needs to be explained.***

The reviewer is entirely correct in their assumption that CD might be working through additional pathways other than the ones detailed in the manuscript. We have no data isolating a single specific mechanism. Indeed, it is likely that CD mediated atheroprotection is multifactorial. However, our data clearly demonstrate that CD promotes LXR activation in plaque macrophages and that LXR is required in myeloid cells for CD-mediated atheroprotection in mice.

In the regression trial, switching to normal chow leads to a dramatic decrease in serum cholesterol levels. Because extracellular cholesterol crystal deposition in the subendothelial layer is primarily dependent on physical properties such as cholesterol concentration and solubility, this switch directly influences plaque composition in all mice. CD however has several beneficial properties that contribute to the regression of established plaques. First, it physically increases cholesterol solubility leading to rapid crystal dissolution and clearance. Second, it promotes cholesterol metabolism and efflux in macrophages. Third, it has anti-inflammatory effects. In contrast, local overabundance of “free” cholesterol upon crystal dissolution after chow change without CD treatment prompts foam cell formation, increased cell death and inflammation. We did not investigate plaque size at longer periods after the diet switch but a certain regression is possible.

We have discussed these limitations of our study in the revised version of the manuscript.

***It would be also useful to probe if CD treatment of cholesterol crystal-loaded macrophages affects macrophage polarization. Work from several labs has shown that there is a change from M1 to M2 macrophages during plaque regression and it would be useful to examine whether this is the case in this model. Are M2 markers enhanced and M1 reduced upon CD treatment of macrophages in vitro (should be able to get this from the array data), and are M2 markers (e.g. Mannose receptor) increased in CD treated compared to control plaques by IHC?***

Thank you for the very interesting suggestion. We have now investigated our data from

human atherosclerotic plaques and found a significant increase of M2 marker gene expression of CD treated samples compared to controls. We could not detect any relevant change in M1 marker genes (see data below). This data is in line with previous studies demonstrating only marginal M1-associated network patterns in M2-macrophages ((3)). The mannose receptor (MRC1), the scavenger receptors (MSR1 and SCARB1), DC-SIGN (CD209) and PPAR $\gamma$  were predominantly increased in CD-treated plaques. However these results need to be interpreted carefully. This is a complex and controversial topic as human M2 markers are not yet established in the literature. Additionally, our recent work suggests that the polarization of human macrophages are more complex than the traditional M1 and M2 dichotomous view suggests (4-6). We therefore opted to not represent these data in the revised manuscript.

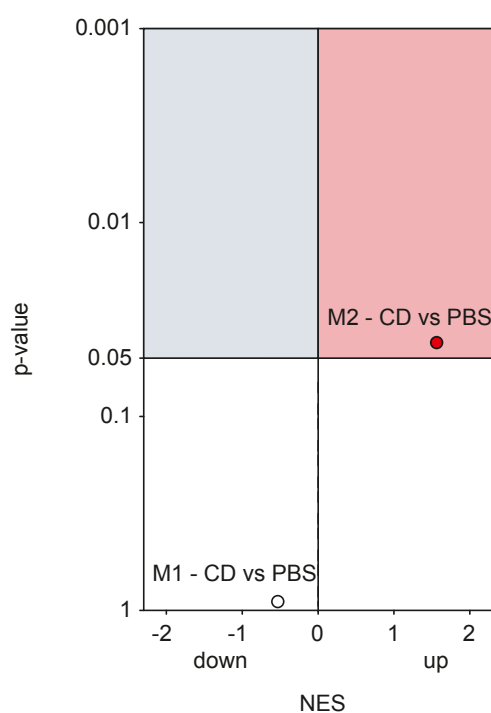

***It is also unclear what is the point of photomicrograph in Figure 3E. A reduction in cholesterol crystals in the DC treated cells over time is difficult to discern from the image.***

Figure 3E only demonstrates the rapid intracellular accumulation of CD. Cholesterol crystal dissolution was not quantified in this experiment. We have rephrased the manuscript to highlight this more clearly.

***It is also puzzling in Figure 4F that ABCA1 expression is induced at the protein level by cholesterol crystal treatment alone (compare control lanes +/- CC in the western blot). Could the authors please comment on this? Also it would be helpful to quantitate the expression of ABCA1 protein levels upon cholesterol crystal treatment as a function of CD treatment.***

The fact that a cholesterol challenge induces ABCA1 expression is expected and congruent with the literature (7, 8). It is the main mechanism by which macrophages clear excessive cholesterol and the foundation of reverse cholesterol transport (9). As demonstrated by McConathy et al. (10) native macrophages can, to a certain extent, mediate cholesterol crystal dissolution and subsequently metabolize crystal derived excessive cholesterol. Figure 4F demonstrates that CD treatment enhances ABCA1 expression on top of these regulatory pathways. ABCA1 protein level as a function of CD treatment was quantified from three individual experiments (only the 10 mM dose is shown in densitometric analysis) and is depicted in a bar graph left of the representative Western blot. The figure legend has been updated to clarify this.

***Overall this manuscript presents an interesting set of results that suggests CD therapy could have value in promoting regression of atherosclerosis.***

Thank you very much.

***Reviewer: 3***

***The authors have demonstrated that 2-hydroxypropyl- $\beta$ -cyclodextrin (CD) is a potential therapeutic for the treatment of atherosclerotic cardiovascular disease and have provided some insight into how CD is modulating macrophages to promote efflux and anti-inflammatory phenotype. There are however some issues still to be resolved.***

***1. Not all the cholesterol in atherosclerotic lesions and macrophages are in crystals. Yet only cholesterol crystals were used in the in vitro studies. The authors have previously shown that cholesterol crystals damage the lysosomes in macrophages and it is not clear if the amount of cholesterol taken up by the macrophages when cells are incubated with 100-200 ug/ml yields levels seen in macrophages in vivo. CD-mediated loss of cholesterol, induction of 27-hydroxysterol and modulation of LXR and anti-inflammatory gene expression in macrophages loaded with cholesterol via other means should be included.***

This is a very intriguing question. In histological analyses of both human and mouse model atherosclerotic plaques (see Figure 1D) it is evident that the amount of cholesterol crystals far exceeds the number of macrophages. Yet, for most of our *in vitro* experiments we incubated macrophages with CC for only 3h. This is below the saturation threshold of macrophage crystal uptake and at the dose used does not induce significant lysosomal damage or NLRP3 inflammasome activation. We would like to point out that we completely concur with the reviewer's comment that one can hardly compare *in vitro* stimulated macrophages with the *in vivo* situation where macrophages are exposed to various forms of cholesterol and other danger signals. In fact, this was a main reason why we performed the *ex vivo* CD incubation experiments of human atherosclerotic plaques illustrated in Figure 7. Here we show that CD mediates cholesterol efflux into the supernatant (Fig. 7A), 27-hydroxycholesterol formation (Fig. 7B), LXR activation (Fig. 7F) and anti-inflammatory gene regulation (Fig. 7E, G, H). These plaques contain the macrophage/crystal ratio relevant to human atherosclerosis and should yield the "correct" levels of other potential confounders.

Still, foam cells formation is classically induced through oxLDL incubation *in vitro*. Here we provided data for the reviewer from one such experiment:

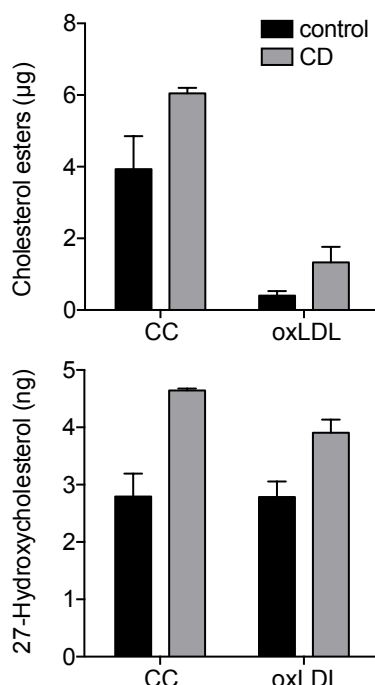

CD mediates cholesterol metabolism and 27-hydroxycholesterol production to a similar degree in both CC and oxLDL loaded macrophages. While this data supports our results

obtained with CC mediated foam cells, we opted not to add other means of cholesterol loading in the manuscript. We believe that our *ex vivo* human plaque studies are more relevant to the *in vivo* situation than experiments with mouse or human *ex vivo* generated foam cells.

**2. Is there evidence of hepatic toxicity by the CD treatment (histological or ATL/AST measurements)? This is important preclinical information. The lack of toxicity in the NPC1 clinical trial could be related to the heightened state of liver toxicity in these individuals prior to treatment.**

CD is not only used as a direct therapeutic agent in NPC1 patients but is also used as a complexing agent to increase the aqueous solubility of active substances and to increase their bioavailability and to improve stability. In addition, CD is used to reduce or prevent gastrointestinal and ocular irritation, reduce or eliminate unpleasant smells or tastes, prevent drug-drug or drug-additive interactions within a formulation, or to convert oils and liquid drugs into microcrystalline or amorphous powders (11). In this context, CD toxicity has been thoroughly evaluated and is considered safe by both the FDA and EMA (12, 13). Subjects receiving up to 24 g of CD per day over 15 days in clinical trials were free from side effects. In fact, Sporanox – a parenteral itraconazole formulation – contains 8 g of CD as a solvent and is given twice daily to patients with systemic fungal infections, no specific adverse effects have been described.

Nevertheless, we have now evaluated the livers of our CD and control treated mice for signs of hepatic toxicity. Interestingly, the signs of liver damage/fibrosis usually observed in ApoE<sup>-/-</sup> mice under cholesterol-rich diets (14) were found to be reduced upon CD treatment. This demonstrated that CD has liver protective rather than liver toxic effects in our experimental settings.

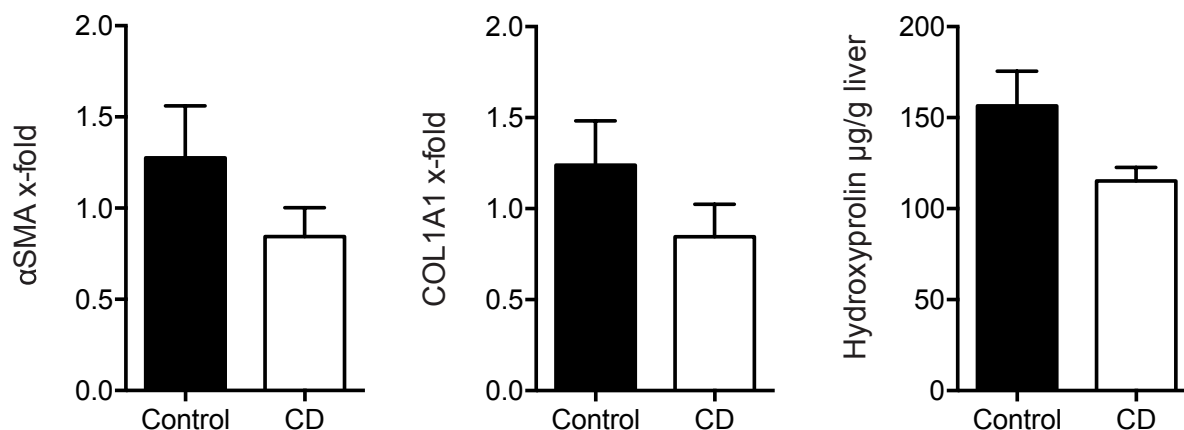



**3. Why were the human carotid plaques treated with the strong proinflammatory stimulator LPS for 6 hours prior to the RNA and lipid analysis? This analysis no longer represents the state of the lesion in vivo. This may not have impacted on the lipid analysis where the only large difference was in the production of 27-hydroxycholesterol. This treatment is problematic for the gene expression analysis as it may have overestimated the effect of CD on inflammation and inflammasome components within the atherosclerotic lesion. The effect of CD treatment on the inflammatory genes is not as dramatic in the mouse lesions which were not exposed to LPS ex vivo.**

We completely agree with the reviewer, addition of LPS to the specimens alters their inflammatory state and would make interpretations difficult. Yet, none of the data presented in the manuscript included samples treated with LPS. We have to apologize that we referred to LPS treated samples in the Material and Method section. We had indeed performed experiments, in which LPS treated plaque samples had been tested side by side, but these data were not shown. We apologize for having overlooked this detail. We have removed all mentions of LPS in the Material and Method section now.

For the information of the reviewer: CD treatment of LPS treated human plaques can indeed reduce a range of inflammatory reactions of the plaques to LPS (see below), yet as mentioned by the reviewer, the relevance of these findings for atherosclerosis are unclear and therefore we have not shown this dataset.

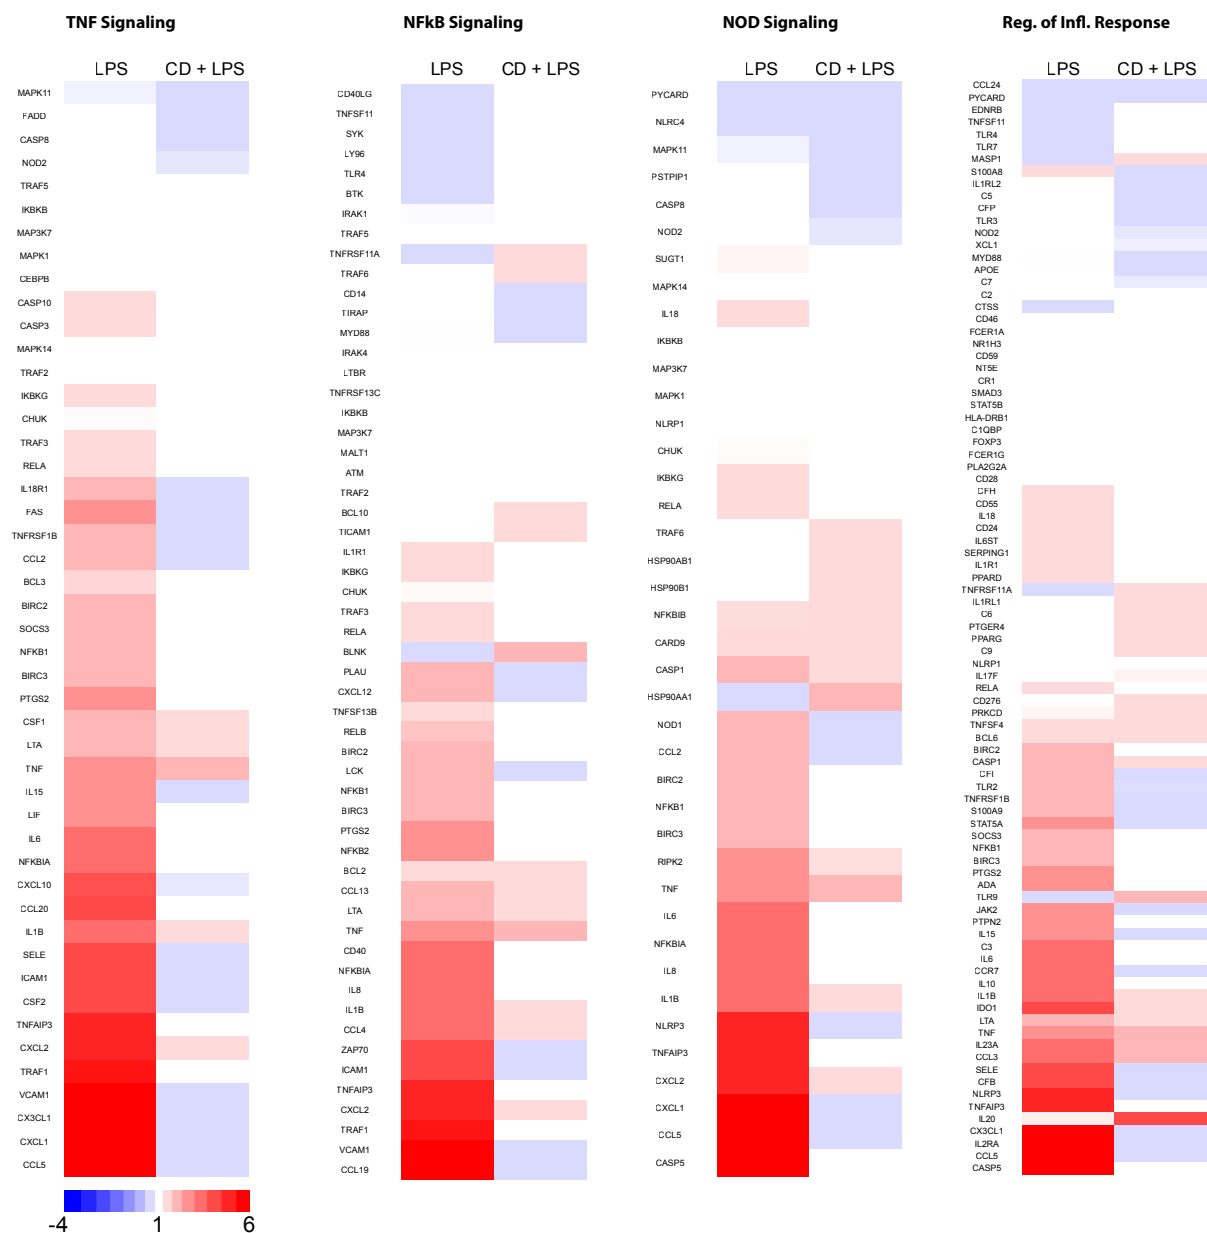

**4. The aortic root, aortic arch and ascending aorta are all different segments of the aorta with different rates of lesion formation. The description in the Methods section (page10) is very unclear as to which location was analyzed for atherosclerosis. Also were the multiple sections quantitated adjacent sections or were they separated by some distance? The later provides a better assessment of the lesion area. How was it determined which sections to use to quantitate lesions at the different sites?**

All plaques were assessed from section of the aortic root at midlevel of the aortic valve. We apologize for the confusing nomenclature; we have corrected this in the revised manuscript. Adjacent sections were used for the individual analyses but plaque size variability within the aortic root is far smaller than the observed differences between CD and control mice.

**5. Is the quantitation in Fig 1B and analyses in Figs 1E-J the aortic arch or the aortic root (the aortic root images are shown in Fig. 1D)? If all the analysis is of the arch, then images of these vessels with the crystal should be shown. For figure 2 also, please indicate the lesion site analyzed. Did CD treatment equally affect all the arterial sites examined?**

As described above and in the materials sections of the manuscript, for Fig. 1B-F sections of the aortic root at midlevel of the aortic valve were analyzed. Quantification of vascular ROS production (Fig. 1G) was performed in aortic segments of the proximal descending aorta just distal the ostium of the left subclavian artery. Cytokine levels illustrated in Fig. 1H-J were measure in plasma.

**6. In Methods (page 12) it is stated that HDL was used in some efflux studies with the D6-cholesterol crystals. These studies were not included in the manuscript but would be useful to include as they would provide an estimate of how effective CD is in the presence of cholesterol acceptors.**

We apologize for the confusing statement in the “Analysis of crystal-derived cholesterol in macrophages”. The sentence referred to an experiment in a previous version of the manuscript, but none of the experiments shown in the current form include reconstituted HDL. As has been previously described (1), HDL can augment the cholesterol efflux capacity of CD. We had performed an experiment confirming these results, but have excluded it from the current manuscript because we felt it did not contribute to the overall story or provided novel insight. The sentence has been removed from the materials section.

**Editor:**

Thank you very much the detailed analysis of our manuscript. We have corrected all points you raised and would like to address your specific comments individually:

**Page 2: Please avoid direct claims of novelty.**

Direct claims of novelty have been removed from the main text.

**Page 3: Whenever you say something is "significant," please provide p value(s) in the text.**

References to significance have been removed from the main text. P-values are now detailed in Table S4 in the Supplementary Materials together with the original data of all figures.

**Page 4: Please change to a complete sentence.**

All subtitles have been changed to complete sentences.

**"Feeding" implies some sort of animals that have mouths, not single cells. Please use a more appropriate term.**

The term "feeding macrophages" has been changed to "loading macrophages with".

**Page 5: Our journal's style is not to use the abbreviations i.e. and e.g.**

The abbreviation i.e. has been removed from the text.

**Why does this figure not have any error bars or significance testing? Was it only done with n=1?**

Figure 6B,C does not have error bars because it represents a calculated AUC from pooled samples of mice within a group. The volume of repetitive urine samples from individual mice is too small for GC-MS-SIM. The figure legend and Materials and Methods section have been reworded to describe this more clearly.

**Page 6: Notably - The difference is so slight, even if significant, that I would hardly call it notable.**

The term “notably” has been substituted with “Comparable to our findings in murine macrophages” to highlight the parallels between our murine *in vitro* and our human plaque *ex vivo* studies.

***The table title just calls them "additional genes." Please be more specific with the title.***

We have adapted the title of Table S2.

***Protein names should always be in all caps and regular font, but gene and mRNA names should be in italics, with all caps if they are human and only first letter capitalized if they are murine. Please make sure to apply this rule throughout the text and figures, main and supplementary.***

Gene and protein names within the main text and figures, as well as in the supplementary documentation have been change to the correct format.

***Page 7: Please add a paragraph discussing the limitations of your study. This is our standard requirement for all articles.***

A paragraph discussing the limitation of our study has now been included in the revised manuscript.

***Page 9: Please begin with a Study Design paragraph (see checklist for instructions).***

A short Study Design paragraph has been added to the beginning of the Materials and Methods section.

***Please specify the vehicle in at least one place, and preferably whenever you discuss it.***

For all animal experiments 200  $\mu$ l 0.9 % NaCl solution was used the vehicle control. This has been specified accordingly in the revised manuscript.

***Sacrificed - By what method?***

Mice were sedated with an intraperitoneal injection of Ketamine (100 mg/kg ) and Xylazine (16 mg/kg) and then sacrificed by cervical dislocation. This has been included in the new manuscript.

**Page 10: KHB - Please specify ingredients or source company or provide citation.**

The modified Krebs-HEPES buffer (pH 7.4) is composed of NaCl 99.01 mM, KCl 4.69 mM, CaCl<sub>2</sub> 1.87 mM, MgSO<sub>4</sub> 1.20 mM, Na-HEPES 20.0 mM, K<sub>2</sub>HPO<sub>4</sub> 1.03 mM, NaHCO<sub>3</sub> 25.0 mM, and D(+)-glucose 11.1 mM and contained additional ascorbic acid (0.28 mM) and indomethacin (0.01 mM). This detail and a reference have been included in the manuscript.

**Page 14: Written consent - Is the "and" a typo or did you mean "written and oral"?**

This was indeed a typo, we have correct it in the revised manuscript.

**Page 15: Please be more specific.**

The paragraph on "Culturing of human atherosclerotic carotid plaques" has been rephrased to explain the experiment more clearly.

**Page 33: For all composite figures such as bar graphs, please provide the original data, ideally in the form of a supplementary table in Excel format.**

A supplementary table (Table S4) in Excel format has been included in the revised submission, it contains all the original data for the main and supplementary figures.

## References

1. V. M. Atger, M. de la Llera Moya, G. W. Stoudt, W. V. Rodriguez, M. C. Phillips, G. H. Rothblat, Cyclodextrins as catalysts for the removal of cholesterol from macrophage foam cells, *J. Clin. Invest.* **99**, 773–780 (1997).
2. L. Zurkinden, C. Solcà, I. A. Vögeli, B. Vogt, D. Ackermann, S. K. Erickson, F. J. Frey, D. Sviridov, G. Escher, Effect of Cyp27A1 gene dosage on atherosclerosis development in ApoE-knockout mice, *FASEB J.* **28**, 1198–1209 (2014).
3. M. Beyer, M. R. Mallmann, J. Xue, A. Staratschek-Jox, D. Vorholt, W. Krebs, D. Sommer, J. Sander, C. Mertens, A. Nino-Castro, S. V. Schmidt, J. L. Schultze, A. Zirlik, Ed. High-resolution transcriptome of human macrophages, *PLoS ONE* **7**, e45466 (2012).
4. T. Röszer, Understanding the Mysterious M2 Macrophage through Activation Markers and

Effector Mechanisms, *Mediators Inflamm.* **2015**, 816460 (2015).

5. J. Xue, S. V. Schmidt, J. Sander, A. Draffehn, W. Krebs, I. Quester, D. De Nardo, T. D. Gohel, M. Emde, L. Schmidleithner, H. Ganesan, A. Nino-Castro, M. R. Mallmann, L. Labzin, H. Theis, M. Kraut, M. Beyer, E. Latz, T. C. Freeman, T. Ulas, J. L. Schultze, Transcriptome-based network analysis reveals a spectrum model of human macrophage activation, *Immunity* **40**, 274–288 (2014).

6. J. L. Schultze, T. Freeman, D. A. Hume, E. Latz, A transcriptional perspective on human macrophage biology, *Semin. Immunol.* **27**, 44–50 (2015).

7. R. M. Lawn, D. P. Wade, M. R. Garvin, X. Wang, K. Schwartz, J. G. Porter, J. J. Seilhamer, A. M. Vaughan, J. F. Oram, The Tangier disease gene product ABC1 controls the cellular apolipoprotein-mediated lipid removal pathway, *J. Clin. Invest.* **104**, R25–31 (1999).

8. T. Langmann, J. Klucken, M. Reil, G. Liebisch, M. F. Luciani, G. Chimini, W. E. Kaminski, G. Schmitz, Molecular cloning of the human ATP-binding cassette transporter 1 (hABC1): evidence for sterol-dependent regulation in macrophages, *Biochem. Biophys. Res. Commun.* **257**, 29–33 (1999).

9. K. J. Moore, F. J. Sheedy, E. A. Fisher, Macrophages in atherosclerosis: a dynamic balance, *Nature Reviews Immunology* **13**, 709–721 (2013).

10. W. J. McConathy, E. Koren, D. L. Stiers, Cholesterol crystal uptake and metabolism by P388D1 macrophages, *Atherosclerosis* **77**, 221–225 (1989).

11. European Medicines Agency, Background review for cyclodextrins used as excipients, *Committee for Human Medicinal Products*, 1–17 (2014).

12. S. Gould, R. C. Scott, 2-Hydroxypropyl-beta-cyclodextrin (HP-beta-CD): a toxicology review, *Food Chem. Toxicol.* **43**, 1451–1459 (2005).

13. T. Loftsson, P. Jarho, M. Másson, T. Järvinen, Cyclodextrins in drug delivery, *Expert Opin Drug Deliv* **2**, 335–351 (2005).

14. R. Schierwagen, L. Maybüchen, S. Zimmer, K. Hittatiya, C. Bäck, S. Klein, F. E. Uschner, W. Reul, P. Boor, G. Nickenig, C. P. Strassburg, C. Trautwein, J. Plat, D. Lütjohann, T. Sauerbruch, F. Tacke, J. Trebicka, Seven weeks of Western diet in apolipoprotein-E-deficient mice induce metabolic syndrome and non-alcoholic steatohepatitis with liver fibrosis, *Sci Rep* **5**, 12931 (2015).
